# Supplementary material
Source: PubMed Central journal article supplement (PMC3779698)
Supplement: NIHMS509507-supplement-1.pdf [file NIHMS509507-supplement-1.pdf]

**Supplemental Figure 1.** Phenotypic composition of the donor population. Spleen and lymph node cells isolated from WT, *Ifnar1*<sup>-/-</sup>, *Ifngr1*<sup>-/-</sup> and *Ifnagr1*<sup>-/-</sup> at 11 days after EAE induction were re-stimulated *in vitro* with MOGp under non-polarized (Non), Th1 polarizing (Th1) or Th17 polarizing (Th17) conditions. After 3 days of culture, the donor population was analyzed before transfer for (A) cells expressing CD4, CD8, B220, CD11b or CD11c by flow cytometry and (B) cells coexpressing CD4, CD25 and FoxP3 (Treg). Donor population did not contain CD11b<sup>+</sup> and CD11c<sup>+</sup> cells (data not shown). Percentage for each population is indicated in the histograms.

**Supplemental Figure 2.** Type I and type II IFNs set activation thresholds in the immune response. Classical EAE data shown in Fig. 1A and Fig. 8 re-analyzed to compare EAE induced by the different MOGp immunization dose in within each mouse line. Data are mean clinical scores  $\pm$  SEM, n=8-14 mice. Low dose is 50  $\mu$ g MOGp, standard dose is 150  $\mu$ g MOGp and high dose is 300 $\mu$ g MOGp. \*\*\*p<0.001 for standard dose vs low dose and standard dose vs high dose (WT) and \*\*p<0.01 for high dose vs standard dose and high dose vs low dose (*Ifngr1*<sup>-/-</sup>), one way Anova (Kruskall-Wallis) non-parametric test.

**Supplemental Figure 3.** The contribution of type I IFN signals to atypical EAE in IFNGR-deficient mice is dependent on MOGp immunization dose. Atypical EAE in mice immunized with 300  $\mu$ g MOGp – high dose (A) and 50  $\mu$ g MOGp – low dose (B). Data are mean clinical scores  $\pm$  SEM, n=8-14 mice. \*\*p<0.01 for low dose MOGp immunized *Ifngr1*<sup>-/-</sup> vs *Ifnagr1*<sup>-/-</sup>, non-parametric student's t-test (Mann-Whitney non-parametric t-test).

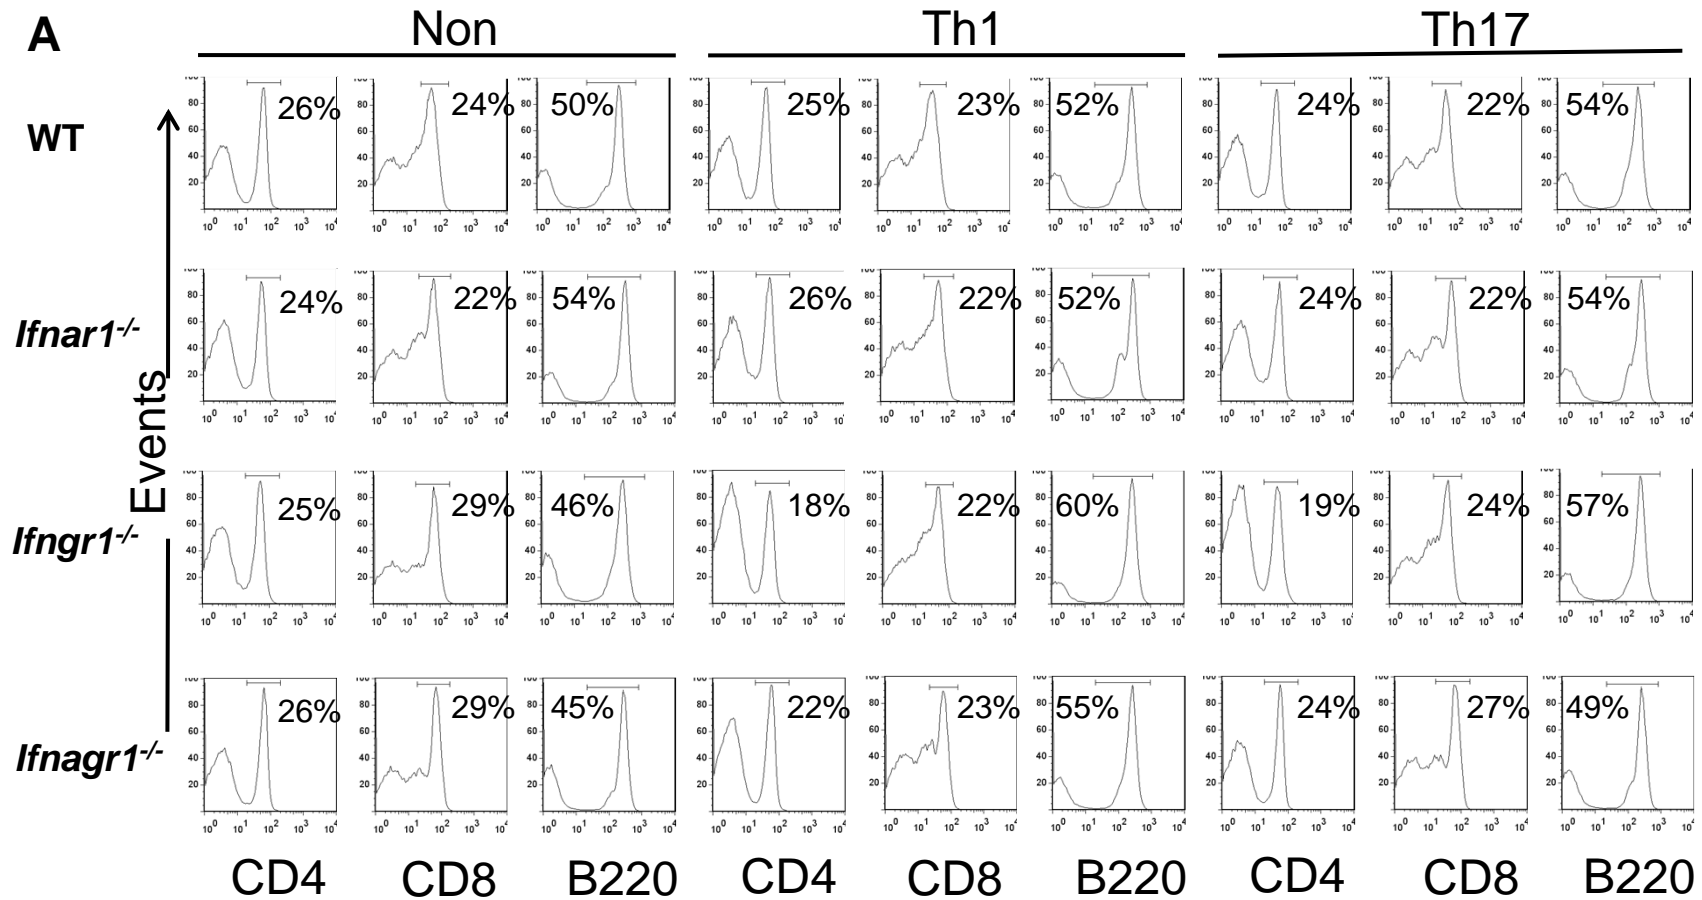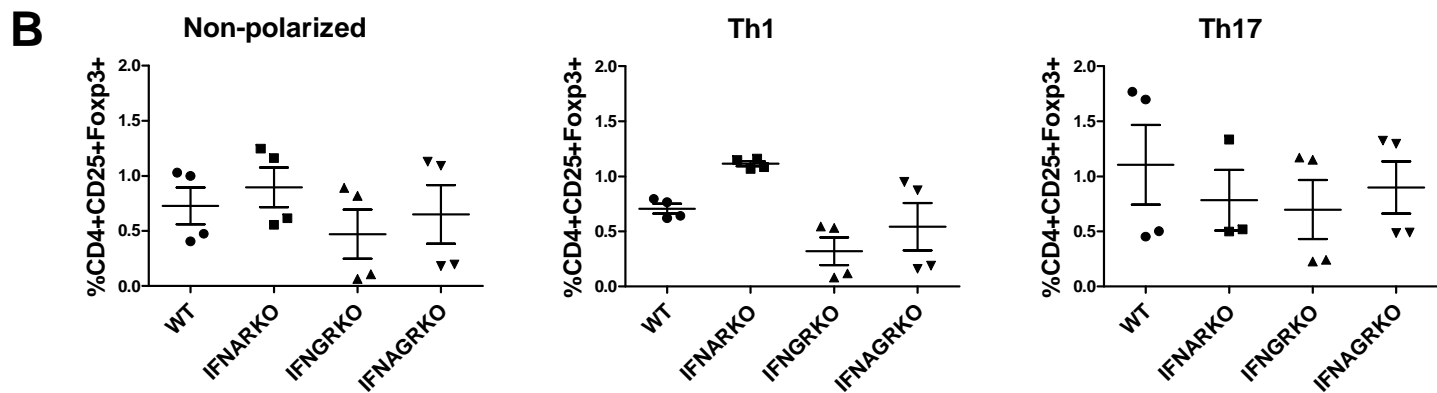

Supplemental Fig. 1

Supplemental table I – Statistical analysis of cytokine and chemokine levels in spinal cord (SC) and brain (cerebellum and brain stem)<sup>a</sup>

| Cytokine      | SC                           |                               |        |                          | Brain  |                          |
|---------------|------------------------------|-------------------------------|--------|--------------------------|--------|--------------------------|
|               |                              |                               | p      | Significant <sup>b</sup> | p      | Significant <sup>b</sup> |
| IFN- $\gamma$ | WT                           | unimm                         | 0.036  | Yes                      | 0.089  |                          |
|               |                              | <i>Ifnar1</i> <sup>-/-</sup>  | 0.252  |                          | 0.295  |                          |
|               |                              | <i>Ifngr1</i> <sup>-/-</sup>  | 0.017  | Yes                      | 0.027  | Yes                      |
|               |                              | <i>Ifnagr1</i> <sup>-/-</sup> | 0.028  | Yes                      | 0.032  | Yes                      |
|               | <i>Ifnar1</i> <sup>-/-</sup> | unimm                         | 0.036  | Yes                      | 0.056  |                          |
|               |                              | <i>Ifngr1</i> <sup>-/-</sup>  | 0.013  | Yes                      | 0.049  | Yes                      |
|               |                              | <i>Ifnagr1</i> <sup>-/-</sup> | 0.018  | Yes                      | 0.016  | Yes                      |
|               | <i>Ifngr1</i> <sup>-/-</sup> | unimm                         | 0.005  | Yes                      | 0.045  | Yes                      |
|               |                              | <i>Ifnagr1</i> <sup>-/-</sup> | 0.490  |                          | 0.302  |                          |
|               |                              | unimm                         | 0.005  | Yes                      | 0.006  | Yes                      |
| IL-17         | WT                           | unimm                         | <0.001 | Yes                      | <0.001 | Yes                      |
|               |                              | <i>Ifnar1</i> <sup>-/-</sup>  | 0.014  | Yes                      | 0.164  |                          |
|               |                              | <i>Ifngr1</i> <sup>-/-</sup>  | 0.006  | Yes                      | 0.010  | Yes                      |
|               |                              | <i>Ifnagr1</i> <sup>-/-</sup> | 0.002  | Yes                      | 0.022  | Yes                      |
|               | <i>Ifnar1</i> <sup>-/-</sup> | unimm                         | <0.001 | Yes                      | 0.004  | Yes                      |
|               |                              | <i>Ifngr1</i> <sup>-/-</sup>  | 0.026  | Yes                      | 0.015  | Yes                      |
|               |                              | <i>Ifnagr1</i> <sup>-/-</sup> | 0.006  | Yes                      | 0.028  | Yes                      |
|               | <i>Ifngr1</i> <sup>-/-</sup> | unimm                         | 0.001  | Yes                      | 0.002  | Yes                      |
|               |                              | <i>Ifnagr1</i> <sup>-/-</sup> | 0.153  |                          | 0.317  |                          |
|               |                              | unimm                         | <0.001 | Yes                      | 0.007  | Yes                      |
| IL-13         | WT                           | unimm                         | 0.004  | Yes                      | 0.003  | Yes                      |
|               |                              | <i>Ifnar1</i> <sup>-/-</sup>  | 0.189  |                          | 0.007  | Yes                      |
|               |                              | <i>Ifngr1</i> <sup>-/-</sup>  | 0.027  | Yes                      | 0.002  | Yes                      |
|               |                              | <i>Ifnagr1</i> <sup>-/-</sup> | 0.042  | Yes                      | 0.002  | Yes                      |
|               | <i>Ifnar1</i> <sup>-/-</sup> | unimm                         | 0.024  | Yes                      | 0.365  |                          |
|               |                              | <i>Ifngr1</i> <sup>-/-</sup>  | 0.084  |                          | 0.079  |                          |
|               |                              | <i>Ifnagr1</i> <sup>-/-</sup> | 0.140  |                          | 0.101  |                          |
|               | <i>Ifngr1</i> <sup>-/-</sup> | unimm                         | 0.096  |                          | 0.240  |                          |
|               |                              | <i>Ifnagr1</i> <sup>-/-</sup> | 0.128  |                          | 0.178  |                          |
|               |                              | unimm                         | 0.023  | Yes                      | 0.274  |                          |
| G-CSF         | WT                           | unimm                         | <0.001 | Yes                      | <0.001 | Yes                      |
|               |                              | <i>Ifnar1</i> <sup>-/-</sup>  | 0.038  | Yes                      | 0.474  |                          |
|               |                              | <i>Ifngr1</i> <sup>-/-</sup>  | 0.002  | Yes                      | 0.045  | Yes                      |
|               |                              | <i>Ifnagr1</i> <sup>-/-</sup> | 0.015  | Yes                      | 0.008  | Yes                      |
|               | <i>Ifnar1</i> <sup>-/-</sup> | unimm                         | 0.002  | Yes                      | 0.026  | Yes                      |
|               |                              | <i>Ifngr1</i> <sup>-/-</sup>  | 0.024  | Yes                      | 0.049  | Yes                      |
|               |                              | <i>Ifnagr1</i> <sup>-/-</sup> | 0.035  | Yes                      | 0.018  | Yes                      |
|               | <i>Ifngr1</i> <sup>-/-</sup> | unimm                         | <0.001 | Yes                      | 0.007  | Yes                      |
|               |                              | <i>Ifnagr1</i> <sup>-/-</sup> | 0.187  |                          | 0.211  |                          |
|               |                              | unimm                         | <0.001 | Yes                      | <0.001 | Yes                      |

<sup>a</sup> Students unpaired t-test was performed for all comparisons.

<sup>b</sup> p<0.05

Supplemental table I (continued) Statistical analysis of cytokine and chemokine levels in spinal cord (SC) and brain (cerebellum and brain stem)<sup>a</sup>

|           |                              |                               | SC     |                          | Brain  |                          |
|-----------|------------------------------|-------------------------------|--------|--------------------------|--------|--------------------------|
| Chemokine |                              |                               | p      | Significant <sup>b</sup> | p      | Significant <sup>b</sup> |
| CXCL10    | WT                           | unimm                         | 0.023  | Yes                      | 0.004  | Yes                      |
|           |                              | <i>Ifnar1</i> <sup>-/-</sup>  | 0.100  | No                       | 0.044  | Yes                      |
|           |                              | <i>Ifngr1</i> <sup>-/-</sup>  | 0.039  | Yes                      | 0.026  | Yes                      |
|           |                              | <i>Ifnagr1</i> <sup>-/-</sup> | 0.035  | Yes                      | 0.020  | Yes                      |
|           | <i>Ifnar1</i> <sup>-/-</sup> | unimm                         | 0.021  | Yes                      | 0.003  | Yes                      |
|           |                              | <i>Ifngr1</i> <sup>-/-</sup>  | 0.046  | Yes                      | 0.050  | Yes                      |
|           |                              | <i>Ifnagr1</i> <sup>-/-</sup> | 0.033  | Yes                      | 0.017  | Yes                      |
|           | <i>Ifngr1</i> <sup>-/-</sup> | unimm                         | <0.001 | Yes                      | <0.001 | Yes                      |
|           |                              | <i>Ifnagr1</i> <sup>-/-</sup> | 0.001  | Yes                      | 0.003  | Yes                      |
|           |                              | unimm                         | 0.013  | Yes                      | 0.289  | No                       |
| CXCL9     | WT                           | unimm                         | <0.001 | Yes                      | <0.001 | Yes                      |
|           |                              | <i>Ifnar1</i> <sup>-/-</sup>  | 0.291  | No                       | 0.085  | No                       |
|           |                              | <i>Ifngr1</i> <sup>-/-</sup>  | <0.001 | Yes                      | 0.003  | Yes                      |
|           |                              | <i>Ifnagr1</i> <sup>-/-</sup> | <0.001 | Yes                      | 0.003  | Yes                      |
|           | <i>Ifnar1</i> <sup>-/-</sup> | unimm                         | <0.001 | Yes                      | 0.001  | Yes                      |
|           |                              | <i>Ifngr1</i> <sup>-/-</sup>  | 0.001  | Yes                      | 0.008  | Yes                      |
|           |                              | <i>Ifnagr1</i> <sup>-/-</sup> | 0.001  | Yes                      | 0.008  | Yes                      |
|           | <i>Ifngr1</i> <sup>-/-</sup> | unimm                         | 0.104  | No                       | 0.171  | No                       |
|           |                              | <i>Ifnagr1</i> <sup>-/-</sup> | 0.107  | No                       | 0.248  | No                       |
|           |                              | unimm                         | 0.350  | No                       | 0.461  | No                       |
| CCL5      | WT                           | unimm                         | 0.002  | Yes                      | <0.001 | Yes                      |
|           |                              | <i>Ifnar1</i> <sup>-/-</sup>  | 0.197  | No                       | 0.471  | No                       |
|           |                              | <i>Ifngr1</i> <sup>-/-</sup>  | 0.018  | Yes                      | 0.015  | Yes                      |
|           |                              | <i>Ifnagr1</i> <sup>-/-</sup> | 0.016  | Yes                      | 0.003  | Yes                      |
|           | <i>Ifnar1</i> <sup>-/-</sup> | unimm                         | <0.001 | Yes                      | 0.003  | Yes                      |
|           |                              | <i>Ifngr1</i> <sup>-/-</sup>  | 0.008  | Yes                      | 0.048  | Yes                      |
|           |                              | <i>Ifnagr1</i> <sup>-/-</sup> | 0.007  | Yes                      | 0.016  | Yes                      |
|           | <i>Ifngr1</i> <sup>-/-</sup> | unimm                         | <0.001 | Yes                      | 0.065  | Yes                      |
|           |                              | <i>Ifnagr1</i> <sup>-/-</sup> | 0.139  | No                       | 0.083  | No                       |
|           |                              | unimm                         | 0.002  | Yes                      | 0.376  | No                       |

<sup>a</sup> Students unpaired t-test was performed for all comparisons.

<sup>b</sup>p<0.05

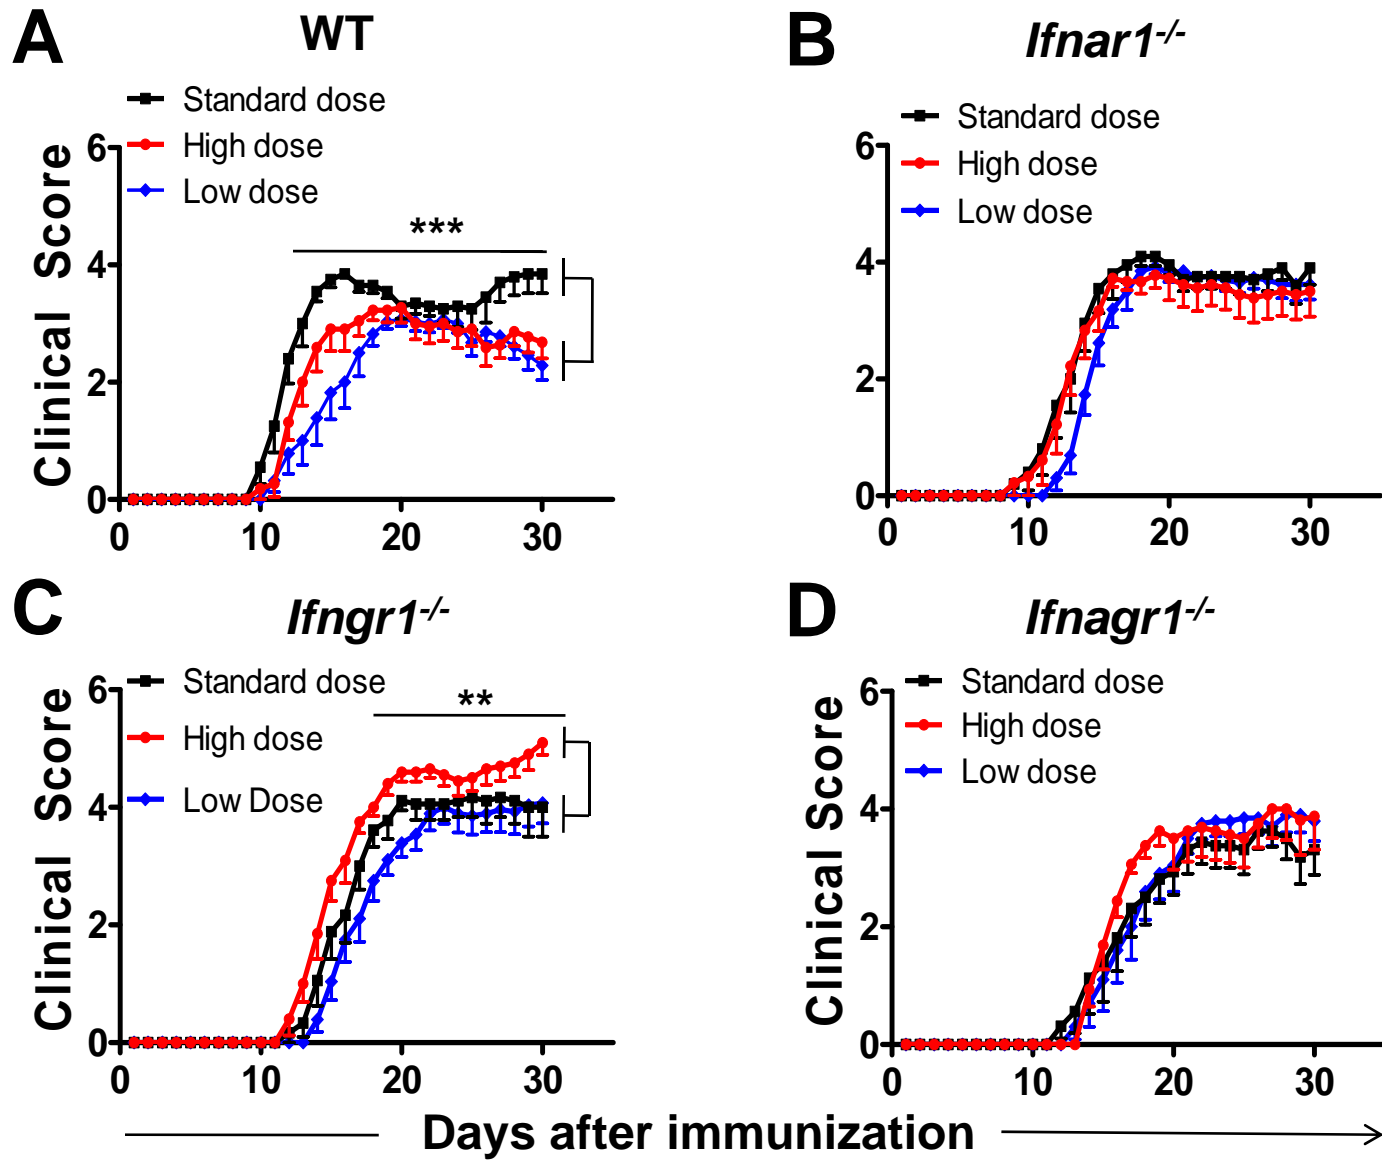

Supplemental Fig. 2

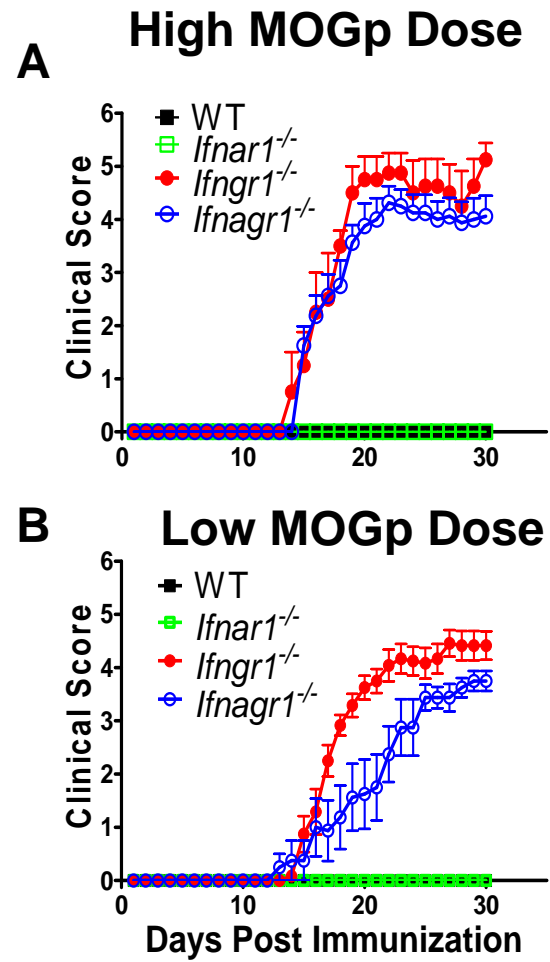

Supplemental Fig. 3
